# Supplementary material
Source: publisher figshare collection journal article supplement (https://gsapubs.figshare.com/ndownloader/files/25999322)
Supplement: Supplementary file 1 [file 25999322]

## Sheet: S7 - Qemscan
Supplemental Material for Ocampo-Díaz, Y.Z.E., Torres-Sánchez, S.A., Augustsson, C., Macías, J.L., Sosa-Ceballos, G., Cisneros-Máximo, G., García-Sánchez, L.,
Osorio-Ocampo, S., Avellan, D.R., Omma, J., Ortega-Obregón, C., Solari, L.A., and González-Barba, G., 2020, Provenance of the El Salto Formation (early Oligocene
to early Miocene), southern part of La Reforma caldera, Baja California Sur, Mexico, in Martens, U.C., and Molina Garza, R.S., eds., Southern and Central Mexico:
Basement Framework, Tectonic Evolution, and Provenance of Mesozoic–Cenozoic Basins: GSA Special Paper 546, p. 1–32, https://doi. org/10.1130/2020.2546(11).
	Table S7: QEMSCAN DATA (ROCKTYPE LTD, UK).
				Yaq-06-17	Yaq-04-17
		RocktypeLtd ID		R1D-001	R1D-002
		Quartz	%	30.7871	31.4001
	Feldspar	Anorthoclase	%	0.793722	0.545482
		KFeldspar_main	%	18.1282	7.39857
		Albite	%	11.0192	5.73148
		Oligoclase	%	0.459387	0.264059
		Labradorite	%	-	0.0310559
	Mica	Biotite_main	%	0.873779	0.67221
		Annite	%	0.0412388	0.0162793
		Muscovite_main	%	0.833125	0.648167
		FeMuscovite	%	0.0419067	0.0244607
		Glauconite	%	0.132148	0.380769
	Clay minerals	Illite_main	%	4.16821	8.06493
		Kaolinite_Dickite	%	11.9877	7.70337
		IlliteSmectite	%	-	0.0126895
		Montmorillonite	%	0.042658	0.0950878
		Nontronite	%	0.018282	0.0356475
		Beidellite	%	0.0459972	0.222066
		OtherClaysBLS	%	0.0922448	0.161708
		QuartzClayMix	%	2.29101	12.2858
	Heavy minerals	Zircon	%	-	0.0174481
		Rutile_Anatase	%	0.130896	0.116126
		Apatite	%	0.100843	0.291692
		DraviteSchorl	%	0.0712914	0.0292193
		Schorl	%	-	0.00768049
		Almandine	%	-	0.00884926
		Staurolite	%	-	0.00667869
	Carbonates	Calcite_Aragonite	%	-	0.0310559
		Dolomite	%	-	9.17902
		FeDolomite	%	-	1.18972
		Ankerite_main	%	-	0.0818974
		Marl	%	0.254612	6.24432
		Siderite_main	%	0.0504216	0.0458325
	Oxides	FeOxides_main	%	0.120377	0.212716
		FeTiOxides	%	0.0147759	0.0181159
		Ilmenite	%	0.0316387	0.132572
		Anhydrite_Gypsum	%	-	0.0124391
		OtherPhasesBLS	%	0.195926	0.179323
		Unclassified_main	%	0.10677	0.449476
		Porosity_main	%	17.1303	6.01524
		Sum	%	99.9639	99.9634
		Phases of < 0.01 % are not shown. - = < 0.01 % or not detected.
